# Supplementary material for: Using Optimal Estimation to Retrieve Winds from VAD scans by a Doppler Lidar
Source: Copernicus journal article supplement (doi:10.5194/amt-2022-337), 2023-01-02
Supplement: Supplementary file [file amt-2022-337-AC1-supplement.pdf]

We thank the reviewer for the helpful comments and suggestions. In the our response to the reviewer comments, the Reviewer Comment is first reproduced in black, followed by our response in blue, and changes to the manuscript in orange.

This manuscript presents a novel method to apply optimal estimation techniques to retrieve the wind profile continuously up to 3 km using Doppler lidar measurements. This overcomes a main limitation in current Doppler lidar wind measurements that are typically limited by the presence of aerosols and clouds in the lower atmosphere. By providing continuous measurements up to 3 km with this method, error covariances are also created facilitating assimilation of the wind profiles into NWP models. The benefits of this new technique over current approaches will be of high interest to readers of AMT, especially those in the remote sensing and NWP communities. However, there are a number of issues that need to be addressed, detailed below, prior to this being fully acceptable to AMT. Most notably, additional analysis (which should be quickly and easily performed) will be necessary to support important claims that VADoe wind retrieval errors meet WMO standards for use in NWP.

#### Specific Comments

1. Line 23: In addition to providing wind speed uncertainty in the abstract, it would be best to provide the vector RMSE to account for wind direction uncertainty for applications where the wind direction is important (e.g., storm mode forecasting, aviation).

We have added vector RMSE to the text as suggested.

We noticed that not all the analysis presented in the paper included the 5 m/s VADoe error threshold filtering criteria described in the paper. We have corrected this in the revised manuscript. Any changes you see with regards to figures and statistics are related to this update

*... OE wind speed and wind vector have uncertainties of 3.44 and 4.33 m/s respectively.*

2. Line 44: Suggest changing 'stares' to 'measures' or 'points', as stares imply the lidar may be pointed in that given position for a prolonged period of time which may not always be true.

We have changed 'stares' to 'measures' as suggested.

3. Line 56: In addition to the proposed VADoe method here, there are other novel methods (e.g., Stephan et al 2019) that can be used to extend the range of lidar wind measurements that should also be referenced and discussed at least in the introduction, perhaps elsewhere. They provide enhanced range compared to VAD and likely lower error statistics than VADoe, but will not provide continuous measurements to 3 km.

We have added following text to the introduction.

*Various techniques have been developed to extend the range of wind profiles from scanning CDL, including accumulation of signal power spectra estimates for direct estimation of the wind vector without estimating radial wind velocities for individual azimuth angles (Smalikho, 2002; Stephan et al., 2019). Although these advanced techniques are able to extract information from noisier Doppler spectra, they are still limited by the availability of the scatterers and hence, do not provide consistent vertical coverage.*

- Section 2.2: While this section is a nice detailed explanation of the VADoe technique, there are some questions that remain. Specifically, how is the VADoe technique applied when there are few or no valid measurements made from the lidar, such as when low-clouds and fog completely attenuate the signal within the lowest tens of meters? Is a retrieval still made? If so, should one be made? If not, how much 'valid' data (measurements above -23 dB) is needed to make a retrieval?

VADoe retrievals are still made even when there are very few or no valid measurements are available for the Doppler Lidar. In such cases, the retrieved profile will follow the a priori profile, and it can be identified using retrieval errors. The figure below (Fig. R1) shows example cases when there was a period with no valid data (red). Profiles are 3 hours apart as radiosondes profiles were only available every 3 hours.

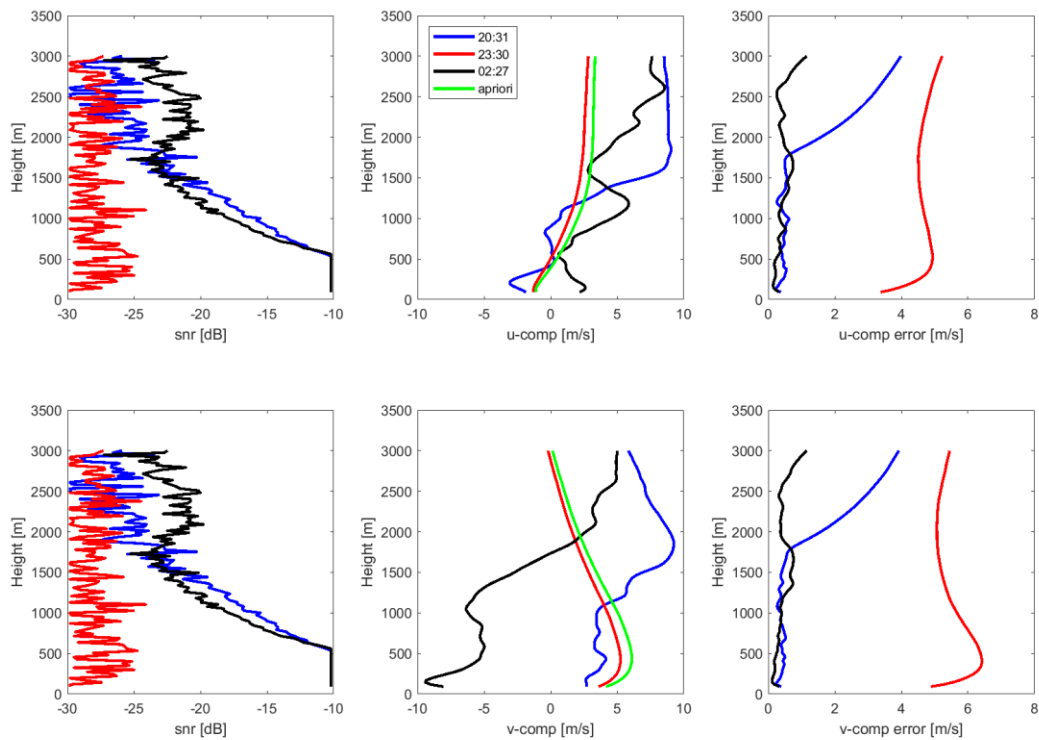

Figure R1: Profiles of (left) snr, (middle) u and v, and (right) u and v error for three different time periods. The red profile is an example of a case when no valid CDL data were available. The green profiles in the middle panel shows the a priori profiles.

We have added following text to manuscript for clarification.

*In cases when there are very few or no valid CDL measurements (e.g. a very low aerosol loading, foggy or rainy day), the retrieved profiles are only constrained by the a priori and hence, follows the a priori profile. Such profiles can easily be identified using the averaging kernel (A) matrix, DOF or retrieval error.*

5. Line 207: Were any other simple quality control measures applied to ensure there were not significant changes in the wind between the radiosonde launch and the lidar measurements (e.g., front passages, convective outflows, etc)? While I'm sure out of the large dataset, there's only small fraction of instances when that may have happened given the lidar profiles are generally <8 min from the radiosonde launch, but these cases may have an outsized effect on later statistics presented. A simple filter looking for large differences in wind speed and direction throughout the sonde and lidar wind profiles could detect these cases.

No, we did not apply any filtering conditions to exclude extreme cases. We did a gross error check by filtering any VAD wind observations with an absolute value greater than 50 m/s assuming that they were unphysical. This information is already included in the manuscript (line 256). We have done the analysis by applying a 3-sigma filter to exclude the extreme outliers instead of the 5 m/s error threshold, and the results looked very similar. Figure R2 is same as Figure 5 in the manuscript but with 3-sigma filter. The correlation coefficient for sonde vs VADtrad, and sonde vs VADoe improved a little for cases where valid VADtrad and VADoe observations were available. There was almost no change for the overall sonde vs VADoe comparison. Thus, we decided to not implement additional filtering conditions to exclude extreme cases.

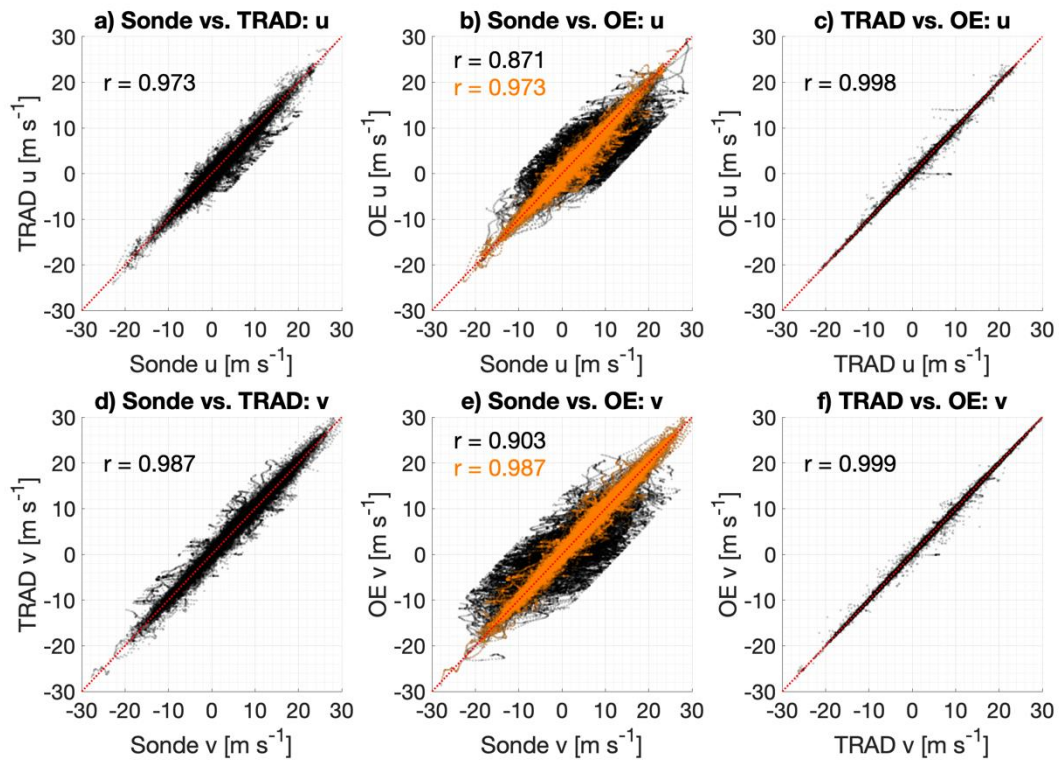

Figure R2: Same as Figure 5 in the manuscript with 3-sigma filtering applied.

- Figure 3: Personally, I find the representation of the 1-sigma confusing, particularly when trying to compare what is shown here with what is discussed in the next (DOF ranges from 4.9 to 25.3). It would be better to show the 1-sigma as error bars around the solid line showing the mean. An alternative option would be to add multiple dashed lines each representing the mean +/- 1 sigma.

We have replaced Figure 3 with the figure shown below, which shows the range of DOF as each altitude. We also replaced the +/- 1 sigma with 25<sup>th</sup> and 75<sup>th</sup> percentile since standard deviation show decrease in Cumulative DFS at higher altitude due to having fewer points.

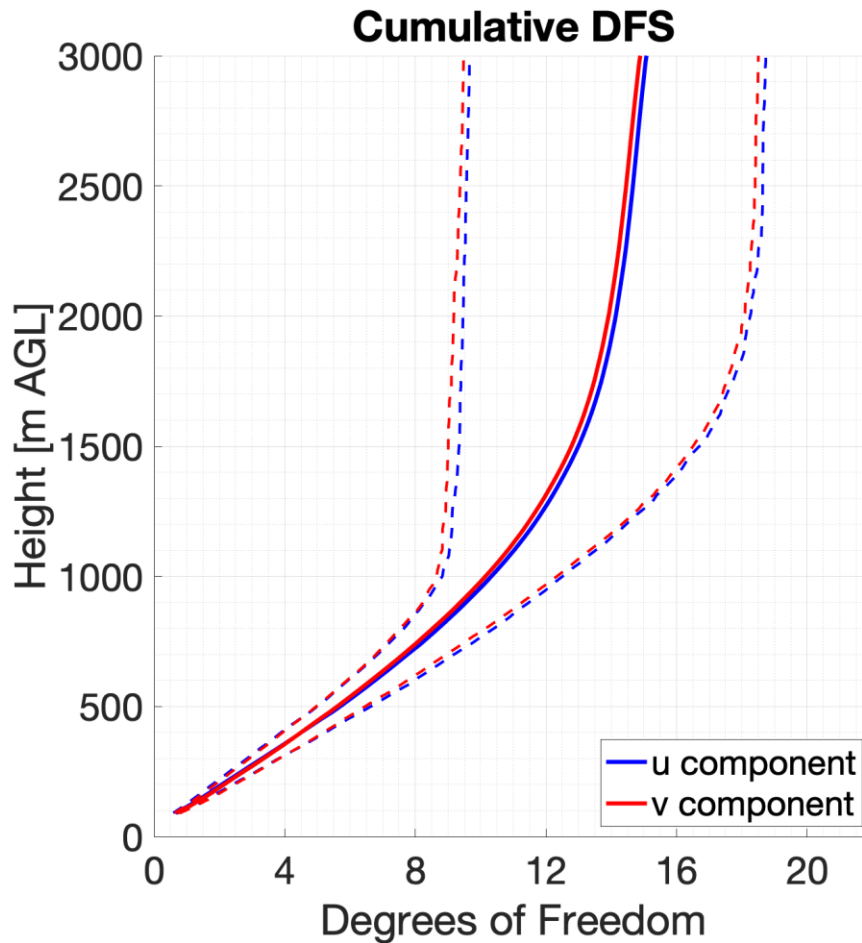

Figure 3: Vertical profile of mean (solid) and 25<sup>th</sup> and 75<sup>th</sup> percentile (dashed) cumulative degrees of freedom of the signal calculated from the OE wind retrieval for both the u component (blue) and v component (red).

- Figure 4: It would be helpful to add an additional panel to show the errors associated with the OE retrieval of v. This would help the reader understand the accuracy of the wind estimate, particularly above the PBL where I assume the magnitude of the vertical striping is within the larger uncertainty of the retrieval at those higher altitudes.

We have added a fourth panel showing errors for OE retrievals of v. We used a different colormap for the error figure to avoid confusion with the other time-height cross-sections.

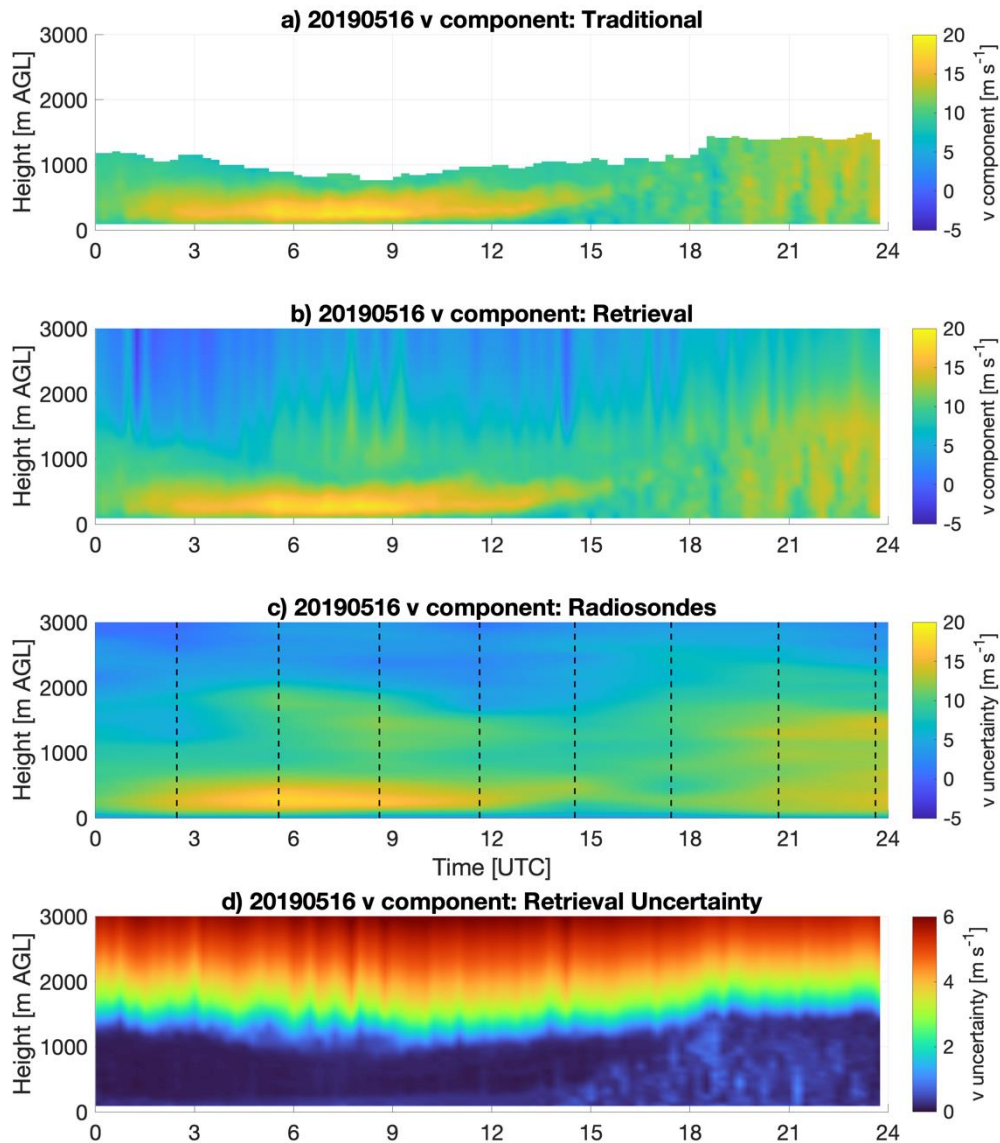

Figure 4: Time-height cross sections of the v component of the wind on 16 May 2019 as observed by VADtrud (a), VADoe (b), and radiosonde (c). The uncertainty in the VADoe retrieval is shown in panel d in a different color scale to enhance detail. Radiosondes were launched every 3 h at the times indicated by dashed lines in the third panel. Radiosondes data are interpolated in time for illustration purposes. Time is in UTC; local time is UTC - 5.

For most part the profile to profile difference in  $v$ ,  $|\delta v|$  (and  $u$ , not shown) is smaller than the OE retrieval error (see Figure R3). Note that the larger  $|\delta v|$  inside the PBL, compared to retrieval error, is due to natural temporal variability and turbulence.

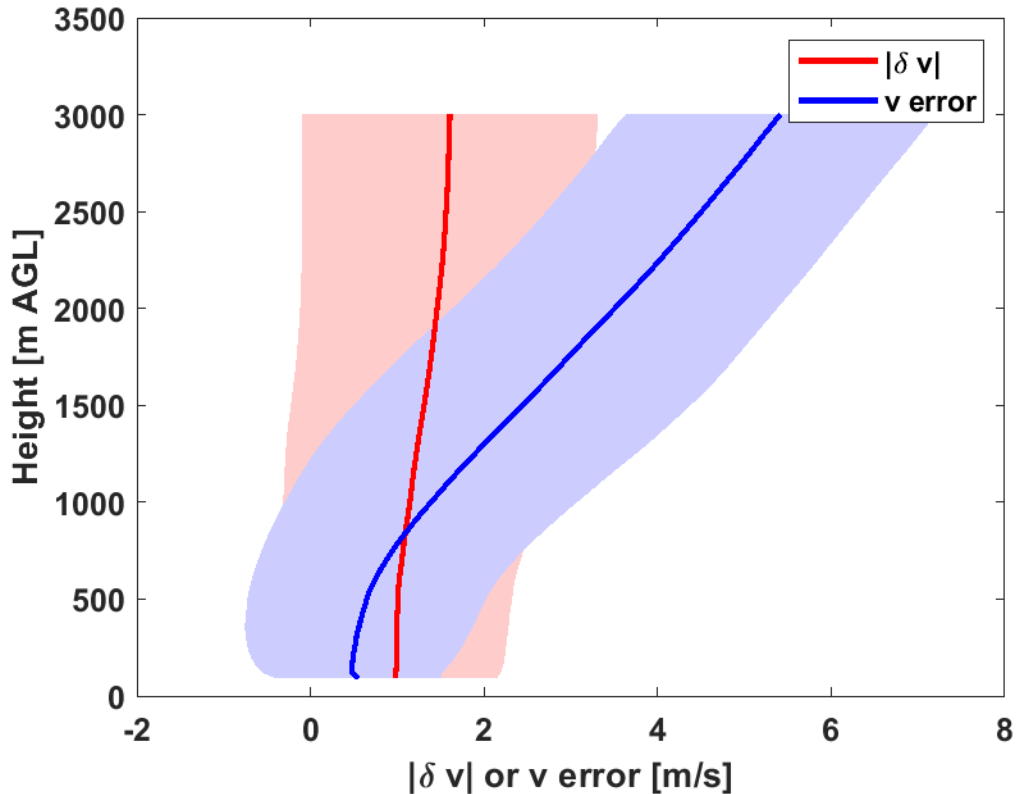

Figure R3: Profile of mean (solid) and 1-sigma (shaded region) absolute profile-to-profile difference of  $v$  component (red) and  $v$  component retrieval error (blue).

*Results at higher altitudes are more influenced by nearest good measurements compared to further away. The profile-to-profile difference at higher altitudes are within VADoe retrieval error for most cases as shown in Fig. 4d.*

8. Line 245: Additional clarification is needed here, likely requiring rewording. Are the radiosonde observations (every 3/6 hr) interpolated to a 15-min resolution for comparison of wind? If that's the case, this is not a good approach as there can be significant errors in interpolating over 3/6 hr gaps, and the comparison should be done by bilinearly interpolating the lidar observations around a radiosonde launch to the launch time (at the VADtrad measurement heights).

Radiosondes observations were available every 3 hours. Each radiosonde was temporally matched to the Doppler lidar profile that was taken nearest in time to the radiosonde launch time. If the closest valid Doppler lidar profile was more than 30 min from the radiosonde launch time, it was excluded from this analysis. This information is included in the paper in line 208-210 (now lines 212-214).

Radiosondes data were averaged to the same vertical grid as VADtrad and not time grid. We have changed “grid” to “vertical grid” for additional clarity. Radiosonde data were interpolated in time in Figure 4c for illustration purposes only.

*Note that radiosonde profiles shown in Fig. 4 are interpolated in time for illustration purposes.*

*To facilitate intercomparisons between the radiosondes and both VADtrad and VADoe, the same vertical grid from the traditional VAD technique was used for the OE output, and the radiosonde observations were interpolated averaged to that grid.*

Line 248: While the OE retrieved profiles are inherently smooth, it's not fair to smooth the radiosonde profiles for the comparison with the OE retrievals but not for the VADtrad measurements. By smoothing the radiosonde profiles for the OE-retrievals, the error statistics are likely going to be biased low (showing better performance than the OE retrievals actually perform when compared with observations, given inherent limitations of the OE method), misleading readers. The radiosondes should not be smoothed for either comparison.

We agree with the reviewer that radiosonde profiles should not be smoothed for comparison with OE retrievals. We actually did not use Averaging Kernel smoothed radiosonde profiles for comparison with OE retrievals as mentioned in the text. We have removed that text from the manuscript. Radiosonde data are available in higher vertical resolution than the Doppler lidar range gates. So, all of the sonde values within a given range gate are averaged together to obtain a representative sonde value for that range gate. Please refer to the reply to the previous comment for changes to the manuscript.

9. Line 251: Wind precision estimates are available for the VAD profiles (as stated at line 77). Why are they not used here, with a similar criterion of rejecting data wherein the uncertainty exceeded 5 m/s?

VADtrad from ARM database does not provide estimates for snr < -21 dB, and hence the errors are much smaller. There are actually no data points with error > 2 m/s, and hence the same filtering criteria was not used. We have added this information to the manuscript for clarity.

*Note that due to the stringent SNR threshold (< -21 dB) applied to the VADtrad data from the ARM database, there were no VADtrad observations with uncertainty greater than 5 m s<sup>-1</sup>.*

10. Lines 328: The bias of the wind speed measurements of VADoe in the low SNR band is considerably worse than the referenced TAMDAR paper (bias of 0.90 m/s, vs -2.52 m/s for VADoe). I do not agree they are comparable as stated.\



We respectfully disagree that the reviewer. Since larger bias is easily correctable and is not as significant of an issue as a larger random error (as quantified by the standard deviation), our statement only compared uncertainties for the TAMDAR and VADoe in the lowest SNR bin, which are indeed comparable. In fact, VADoe uncertainty is better compared to TAMDAR without  $3\sigma$  check (4.49 m/s for VADoe vs 6.44 m/s for TAMDAR). We have updated our analysis by applying 5 m/s VADoe retrieval error filter to the consistent with the rest of the manuscript. The new bias and uncertainty for the lowest SNR band is -1.46 m/s and 3.44 m/s respectively. This is comparable to TAMDAR uncertainty of 3.37 m/s after  $3\sigma$  check. Hence, we have left the statement as it is.

11. Line 330: Insufficient results are presented to support the claim here that the VADoe measurements at the low SNR band meet the WMO threshold requirement for horizontal wind in the free troposphere for global and high-resolution NWP. The WMO requirements referenced are given as the vector error in m/s. The authors do not present the vector error, but instead only present results for the wind speed and wind direction separately. The vector error will be a combination of these, and will be considerably worse than the presented wind speed error alone. In order to ensure that the VADoe wind retrievals at the lower SNR are acceptable for assimilation into NWP following WMO standards, the authors must also present result showing the performance of VADoe vector RMSE. This will require the additional analysis and another set of figures, similar to Figures 7/8, with a supporting discussion.

We have add new wind vector difference analysis as suggested (Figure 9). The wind vector RMSD for the lowest SNR band is 4.3 m/s, which is within the 5 m/s WMO threshold requirement. We have also modified the statement to highlight that VADoe error could be used as filtering criteria to select that meet different application requirements.

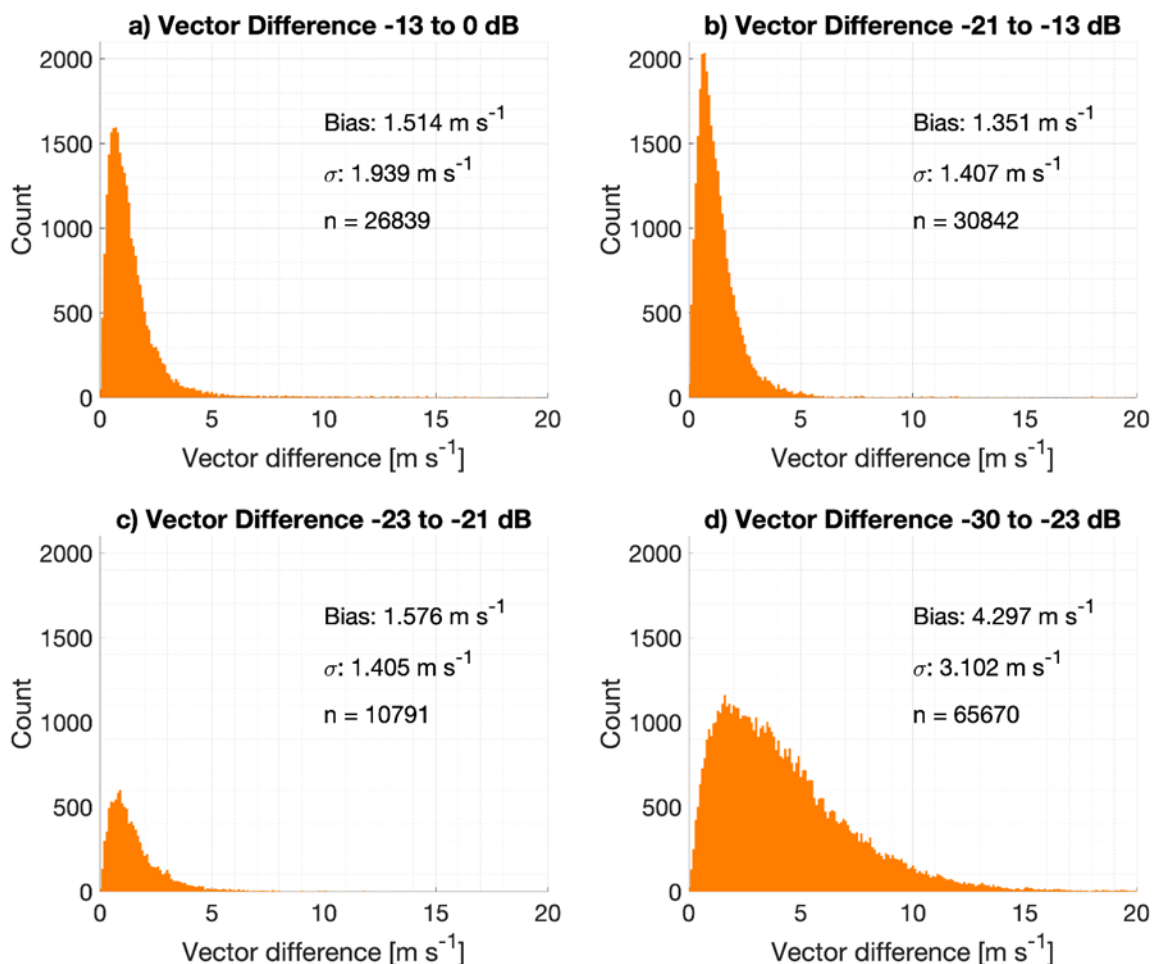

Figure 9: As in Fig. 7, but for vector differences (in m/s).

*The wind vector RMSD of less than 5 m/s, which is the error threshold used in the analyses, for this SNR group further supports that the VADoe retrieval errors are representative, and can be used to select data to meet different application requirements. For example, VADoe data filtered for greater than 5 m/s error would meet the WMO threshold requirement for horizontal wind measurements in the free troposphere for Global and high resolution NWP (WMO, 2022).*

12. Line 363-365: Similar to the two above comments, this statement must be removed or further supported with additional data analysis. The VADoe estimates at the additional effective range appear to be significantly worse than TAMDAR and may not meet WMO threshold requirements for NWP.

We have removed this statement from the conclusion as it could be wrongly interpreted as all VADoe data would meet these requirements. However, we have added analysis/figures to support this statement earlier in the paper. Please see reply to the previous two comments for details.

## Reference

Stephan, A., Wildmann, N. and Smalikho, I.N., 2019. Effectiveness of the MFAS method for determining the wind velocity vector from windcube 200s lidar measurements. *Atmospheric and Oceanic Optics*, 32, pp.555-563.

[This reference has been added to the paper along with Smalikho \(2003\).](#)

*Smalikho, I.: Techniques of wind vector estimation from data measured with a scanning coherent Doppler Lidar, J. Atmos. Ocean. Technol., 20(2), doi:10.1175/1520-0426(2003)020<0276:TOWVEF>2.0.CO;2, 2003.*
